# Supplementary material for: One-step transformation of MnO2 into MnO2−x@carbon nanostructures for high-performance supercapacitors using structure-guided combustion waves
Source: Royal Society of Chemistry journal article supplement (doi:10.1039/c7ta03259e), 2017-01-01
Supplement: c7ta03259e1.pdf [file c7ta03259e1.pdf]

1 < Supporting information >

2

3 **One-Step Transformation of MnO<sub>2</sub> into MnO<sub>2-x</sub>@Carbon**  
4 **Nanostructures for High-Performance Supercapacitors using**  
5 **Structure-Guided Combustion Waves**

6

7

8 *Jungho Shin<sup>‡</sup>, Dongjoon Shin<sup>‡</sup>, Hayoung Hwang, Taehan Yeo, Seonghyun Park and Wonjoon*

9

*Choi\**

10

11

12 School of Mechanical Engineering, Korea University, Seoul, Korea, 136-701

13

14

15

16 \* Author to whom any correspondence should be addressed.

17 E-mail: [wojchoi@korea.ac.kr](mailto:wojchoi@korea.ac.kr), Phone: +82 2 3290 5951, Fax: +82 2 926 9290.

18 ‡ These authors contributed equally to this work.

19

20 Keywords: combustion synthesis; manganese oxide; phase transformation; carbon coating;  
21 chemical synthesis; supercapacitor

22

## 1 Calculation of specific capacitance from scan rate or current density

2

3 A specific capacitance was calculated from the CV curve by the subtraction of the capacitance  
4 between bare MWCNT electrode and MnO<sub>x</sub>/MWCNT electrode using the following equation:

$$5 \quad C = \frac{\int_{V_1}^{V_2} \{I_v(MnO_x/MWCNT) - I_v(MWCNT)\} dV}{\Delta V \times v \times m(MnO_x)}$$

6 where  $C$  is the specific capacitance (F/g),  $I_v$  is the current at a specific scan rate during charge  
7 and discharge cycling (A),  $\Delta V$  is the applying voltage (V),  $v$  is the scan rate (V/s), and  $m$  is the  
8 mass of deposited MnO<sub>x</sub> (g).

9

10 A Specific capacitance was also obtained from the charge–discharge cycle (current density)  
11 using the following equation:

$$12 \quad C = \frac{I \times \Delta t}{\Delta V \times m(MnO_x)}$$

13 where  $C$  is the specific capacitance (F/g),  $I$  is the current during charge and discharge cycling (A),  
14  $\Delta t$  is the discharge time (s),  $\Delta V$  is the potential window (V), and  $m$  is the mass of deposited  
15 MnO<sub>x</sub> (g).

16

17

18

19

20

1

2 **Cyclic voltammetry (CV) curves for  $\text{Mn}_2\text{O}_3/\text{Mn}_3\text{O}_4/\text{MnO}@C$ ,  $\text{MnO}@C$  and  $\text{MnO}_2$**   
3 **electrodes.**

4

5 All electrodes, fabricated by filtrating manganese oxide nanoparticles and nanostructures on  
6 MWCNT current collector film were investigated through cyclic voltammetry (CV) (Figure S1).  
7 CV curves were measured in 0.8 V potential window, at scan rates of 10, 25, 50, 100, 250 and  
8 500 mV/s within  $\text{Na}_2\text{SO}_4$  1 M electrolyte.

9

10 Galvanostatic charge-discharge curves were measured at various current densities of 0.5, 1, 2, 5  
11 and 10 A/g with the potential window between 0 and 0.8 V for  $\text{Mn}_2\text{O}_3/\text{Mn}_3\text{O}_4/\text{MnO}@C$  (Figure  
12 S2a) and  $\text{MnO}@C$  (Figure S2b). Those charge-discharge curves showed good bilateral  
13 symmetry and linear energy quantity slopes at both charging and discharging periods. The  
14 highest specific capacitance based on the current density rate was 415.6 F/g at 0.5 A/g of current  
15 density. The larger current density resulted in the smaller specific capacitance for all electrodes  
16 (Figure S2c).

17

18

19

20

21

22

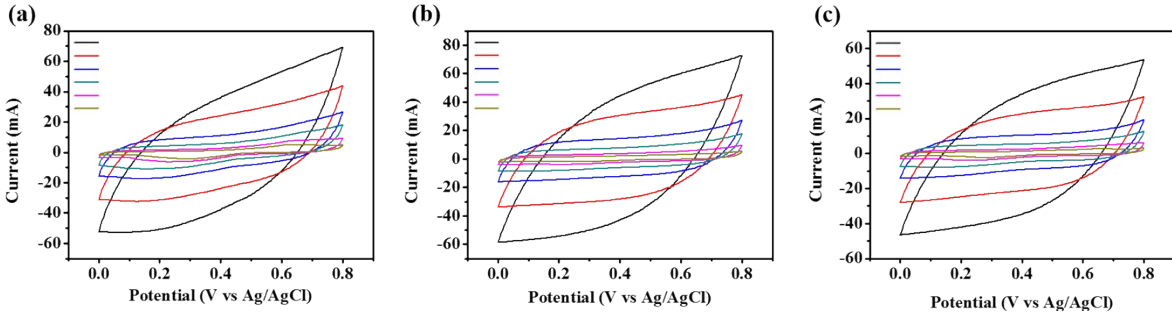

1

2 **Figure S1.** Cyclic voltammetry (CV) curves for (a) Mn<sub>2</sub>O<sub>3</sub>/Mn<sub>3</sub>O<sub>4</sub>/MnO@C, (b) MnO@C and (c)  
 3 MnO<sub>2</sub> electrodes.

4

5

6

7

8

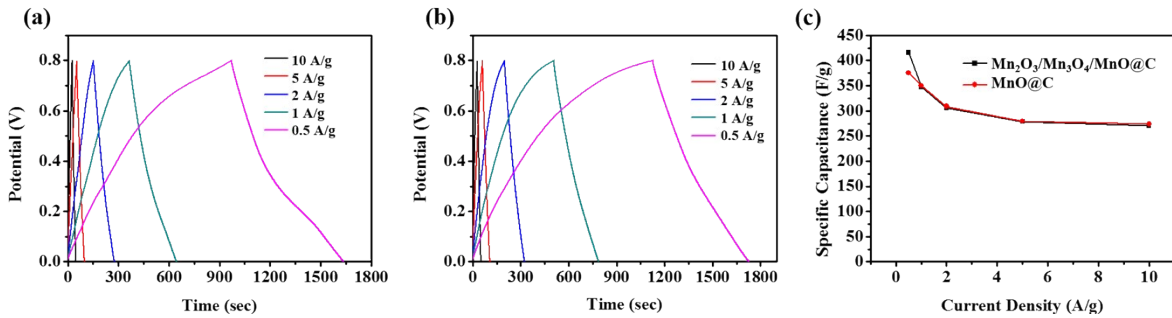

9

10 **Figure S2.** Galvanostatic charge–discharge performances of (a) Mn<sub>2</sub>O<sub>3</sub>/Mn<sub>3</sub>O<sub>4</sub>/MnO@C-based  
 11 electrode and (b) MnO@C-based electrode at different current densities. (c) Specific  
 12 capacitances of Mn<sub>2</sub>O<sub>3</sub>/Mn<sub>3</sub>O<sub>4</sub>/MnO@C-based electrode and MnO@C-based electrode at  
 13 different current densities.

14

15

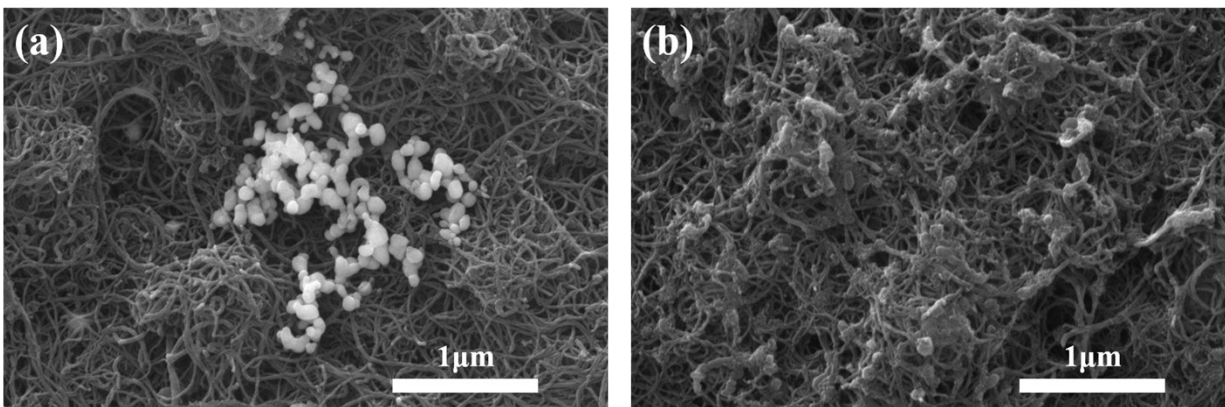

2 **Figure S3.** Scanning electron microscope (SEM) image for  $\text{Mn}_2\text{O}_3/\text{Mn}_3\text{O}_4/\text{MnO}@C$ ,  
3  $\text{MnO}@C$  electrodes supercapacitors after 5000 times charge-discharge cycling. SEM  
4 images of (a)  $\text{Mn}_2\text{O}_3/\text{Mn}_3\text{O}_4/\text{MnO}@C$  and (b)  $\text{MnO}@C$  electrodes after 5000 times charge-  
5 discharge cycling. There are no change of morphology in nanostructure of  $\text{MnO}_x@C$ .

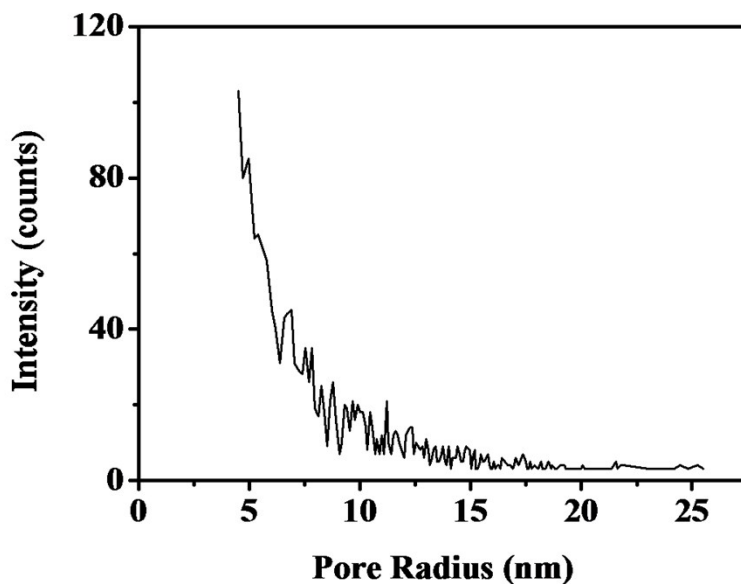

15 **Figure S4.** Pore size distribution of  $\text{MnO}_x@C$ , analyzed by ImageJ.
